# Supplementary material for: Chemical state and atomic structure in stoichiovariants photochromic oxidized yttrium hydride thin films
Source: publisher site journal article supplement (doi:10.1515/zpch-2023-0507), 2024-02-26
Supplement: Supplementary file 1 [file j_zpch-2023-0507_suppl_001.docx]

| **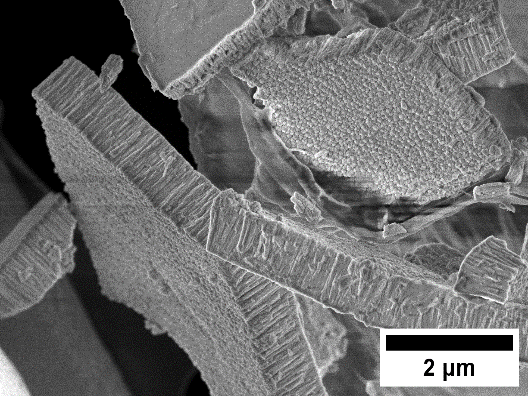** | 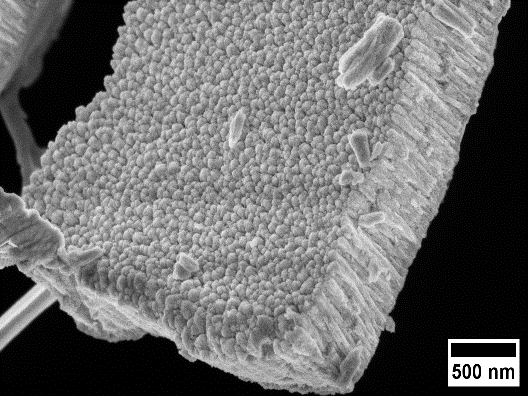 |
| --- | --- |
| **Fig. S1.** High-resolution SEM image of sample produced by magnetron sputtering, in powder. Columnar growth of the thin film is visible in the both (right and left) images. | |
